# Supplementary material for: Evaluation of tenascin-C by tenatumomab in T-cell non-Hodgkin lymphomas identifies a new target for radioimmunotherapy
Source: PubMed Central journal article supplement (PMC5839400; doi:10.18632/oncotarget.23919), 2018-01-03
Supplement: oncotarget-09-9766-s001.pdf [file oncotarget-09-9766-s001.pdf]

# Evaluation of tenascin-C by tenatumomab in T-cell non-Hodgkin lymphomas identifies a new target for radioimmunotherapy

## SUPPLEMENTARY MATERIALS

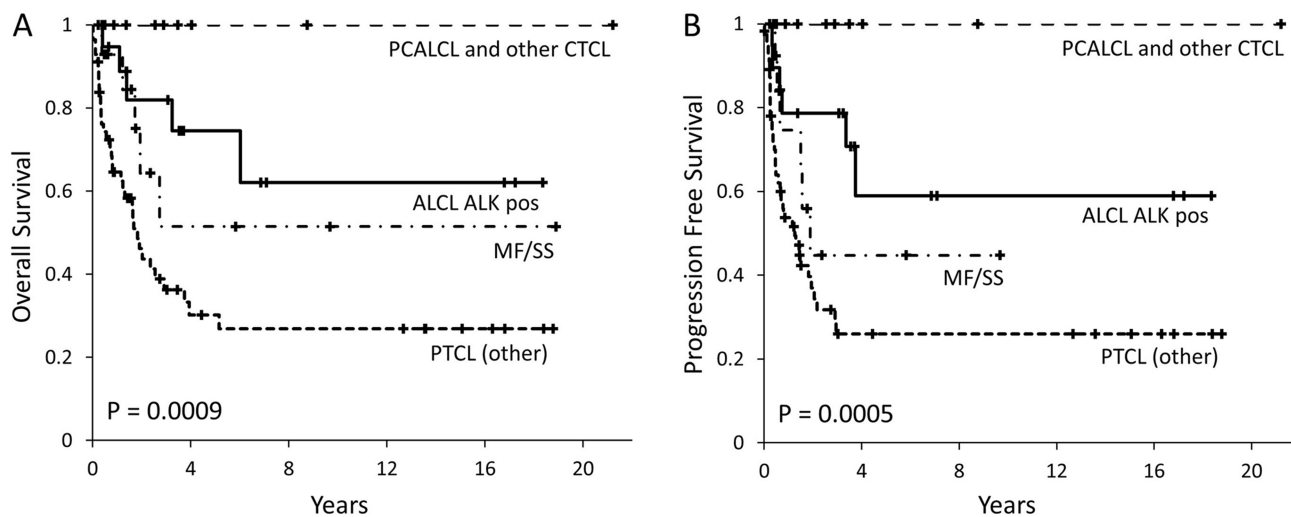

**Supplementary Figure 1:** Overall survival (A) and progression free survival (B) according to diagnosis in the whole cohort. ALCL ALK+:anaplastic large cell lymphoma ALK positive (N = 19); PTCL others: peripheral T-cell lymphoma with diagnosis different than ALCL ALK positive (N = 56) ; MF/SS: Mycosis fungoides/Sézary syndrome (N = 14); PCALCL: primary cutaneous ALCL (N = 6); Others: includes CD4+ small/medium cell primary cutaneous lymphoma (N = 5).

**A** Iqbal et al., GSE19069

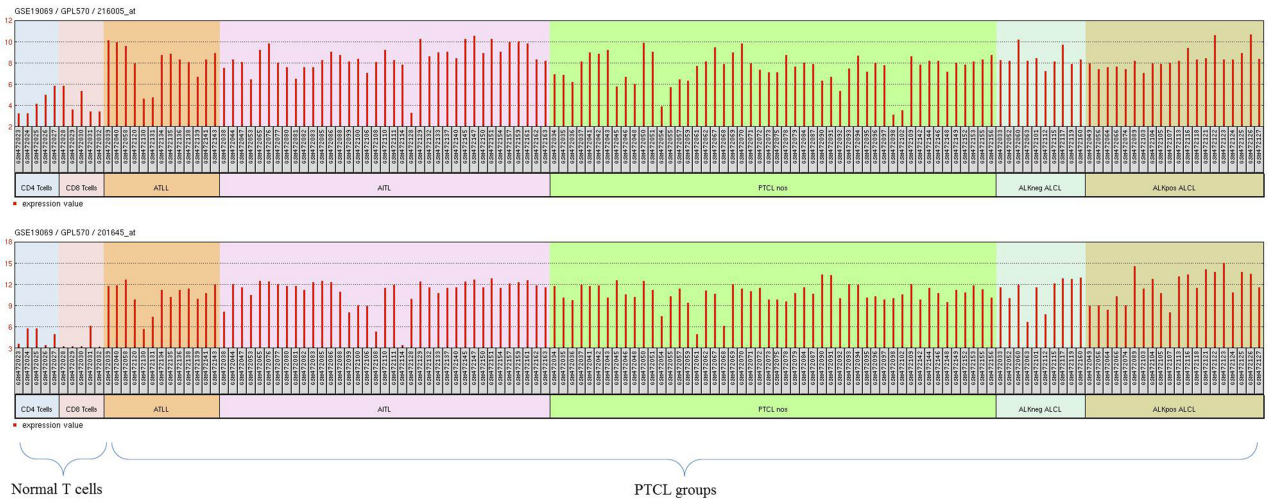

**B** Piccaluga et al., GSE6338

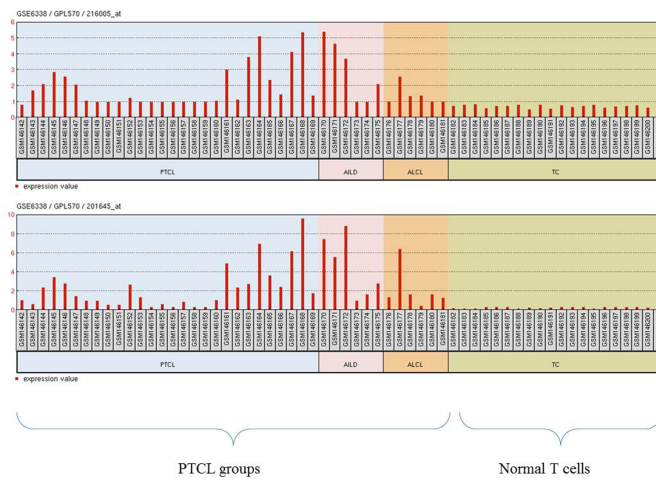

**Supplementary Figure 2:** Detailed view of expression values for TNC probes (210065\_at and 201645\_at) in all considered normal and lymphoma samples for (A) Iqbal et al. 2010 [25] GSE19069 dataset and, (B) Piccaluga et al. 2007 [26] dataset GSE6338.

**Supplementary Table 1: Proportion of involved areas according to method of detection**

| Histology                                                           | N          | Digital Determination - Continuous (%) | Digital Determination - Score (%) |           |           |          | Manual Determination - Score (%) |           |           |          |
|---------------------------------------------------------------------|------------|----------------------------------------|-----------------------------------|-----------|-----------|----------|----------------------------------|-----------|-----------|----------|
|                                                                     |            | Median (range)                         | 0-25                              | 26-50     | 51-75     | 76-100   | 0-25                             | 26-50     | 51-75     | 76-100   |
| <b>Precursor (lymphoblastic) T-cell NHL</b>                         | <b>3</b>   | <b>67 (0-75)</b>                       | <b>1</b>                          | <b>0</b>  | <b>2</b>  | <b>0</b> | <b>1</b>                         | <b>0</b>  | <b>2</b>  | <b>0</b> |
| <i>Peripheral T-cell lymphoma, not otherwise specified</i>          | 20         | 44 (0-83)                              | 5                                 | 9         | 5         | 1        | 5                                | 9         | 5         | 1        |
| <i>Anaplastic large cell lymphoma, ALK negative</i>                 | 21         | 67 (0-90)                              | 2                                 | 2         | 14        | 3        | 2                                | 2         | 14        | 3        |
| <i>Anaplastic large cell lymphoma, ALK positive</i>                 | 19         | 53 (22-85)                             | 0                                 | 8         | 9         | 2        | 0                                | 8         | 9         | 2        |
| <i>Angioimmunoblastic T-cell lymphoma</i>                           | 9          | 60 (30-90)                             | 0                                 | 2         | 6         | 1        | 0                                | 2         | 6         | 1        |
| <i>Enteropathy-associated T-cell lymphoma</i>                       | 2          | 42 (0-84)                              | 1                                 | 0         | 0         | 1        | 1                                | 0         | 0         | 1        |
| <i>Hepatosplenic T-cell lymphoma</i>                                | 1          | 38 (38-38)                             | 0                                 | 1         | 0         | 0        | 0                                | 1         | 0         | 0        |
| <b>PTCL (subtotal)</b>                                              | <b>72</b>  | <b>58 (0-90)</b>                       | <b>8</b>                          | <b>22</b> | <b>34</b> | <b>8</b> | <b>8</b>                         | <b>22</b> | <b>34</b> | <b>8</b> |
| <i>Mycosis fungoides</i>                                            | 13         | 34 (0-70)                              | 1                                 | 9         | 3         | 0        | 1                                | 9         | 3         | 0        |
| <i>Primary cutaneous anaplastic large cell lymphoma</i>             | 6          | 56 (0-73)                              | 1                                 | 2         | 3         | 0        | 1                                | 2         | 3         | 0        |
| <i>CD4<sup>+</sup> small/medium cell primary cutaneous lymphoma</i> | 5          | 0 (0-45)                               | 3                                 | 2         | 0         | 0        | 3                                | 2         | 0         | 0        |
| <i>Sézary syndrome</i>                                              | 1          | 56 (56-56)                             | 0                                 | 1         | 0         | 0        | 0                                | 1         | 0         | 0        |
| <b>CTCL (subtotal)</b>                                              | <b>25</b>  | <b>34 (0-73)</b>                       | <b>5</b>                          | <b>14</b> | <b>6</b>  | <b>0</b> | <b>5</b>                         | <b>14</b> | <b>6</b>  | <b>0</b> |
| <b>Total</b>                                                        | <b>100</b> | <b>51 (0-90)</b>                       | <b>14</b>                         | <b>36</b> | <b>42</b> | <b>8</b> | <b>14</b>                        | <b>36</b> | <b>42</b> | <b>8</b> |

Legend: NHL: non-Hodgkin lymphoma; PTCL: peripheral T-cell lymphoma; CTCL: cutaneous T-cell lymphoma.

**Supplementary Table 2: Multivariate analysis for PFS and OS in systemic T-cell NHL patients with digital image analysis (N = 75)**

| Factors                                                                            | Multivariate for PFS     |               |                          |               | Multivariate for OS      |               |                          |               |
|------------------------------------------------------------------------------------|--------------------------|---------------|--------------------------|---------------|--------------------------|---------------|--------------------------|---------------|
|                                                                                    | HR (95% CI)              | P value       | HR (95% CI)              | P value       | HR (95% CI)              | P value       | HR (95% CI)              | P value       |
| <b>Proportion of involved areas (%) (by Digital Image Analysis)</b>                |                          |               |                          |               |                          |               |                          |               |
| 0-50                                                                               | 1.00                     |               |                          |               | 1.00                     |               |                          |               |
| 51-100                                                                             | <b>0.49 (0.25-0.95)</b>  | <b>0.0337</b> |                          |               | 0.56 (0.28-1.12)         | 0.1034        |                          |               |
| <b>Proportion of involved areas (continuous value) (by Digital Image Analysis)</b> |                          |               | 0.32 (0.09-1.17)         | 0.0870        |                          |               | 0.31 (0.08-1.23)         | 0.0944        |
| <b>Age</b>                                                                         |                          |               |                          |               |                          |               |                          |               |
| ≤ 60                                                                               | 1.00                     |               | 1.00                     |               | 1.00                     |               | 1.00                     |               |
| > 60                                                                               | 1.54 (0.70-3.38)         | 0.2866        | 1.36 (0.62-2.99)         | 0.4422        | 1.81 (0.81-4.05)         | 0.1485        | 1.65 (0.75-3.61)         | 0.2144        |
| <b>Gender</b>                                                                      |                          |               |                          |               |                          |               |                          |               |
| Female                                                                             | 1.00                     |               | 1.00                     |               | 1.00                     |               | 1.00                     |               |
| Male                                                                               | 1.13 (0.57-2.24)         | 0.7366        | 1.19 (0.60-2.34)         | 0.6184        | 1.48 (0.73-3.02)         | 0.2797        | 1.57 (0.76-3.21)         | 0.2203        |
| <b>IPI</b>                                                                         |                          |               |                          |               |                          |               |                          |               |
| Low                                                                                | 1.00                     |               | 1.00                     |               | 1.00                     |               | 1.00                     |               |
| Interm-Low                                                                         | 1.67 (0.59-4.70)         | 0.3330        | 1.75 (0.62-4.97)         | 0.2927        | 1.98 (0.67-5.84)         | 0.2155        | 2.01 (0.68-5.95)         | 0.2069        |
| Interm-High                                                                        | 1.78 (0.69-4.77)         | 0.2481        | 1.80 (0.65-4.94)         | 0.2555        | 1.87 (0.64-5.51)         | 0.2542        | 1.80 (0.60-5.39)         | 0.2964        |
| High                                                                               | <b>4.11 (1.61-10.52)</b> | <b>0.0032</b> | <b>4.09 (1.53-10.92)</b> | <b>0.0049</b> | <b>5.12 (1.93-13.54)</b> | <b>0.0010</b> | <b>5.14 (1.91-13.89)</b> | <b>0.0012</b> |

Legend: NHL: non-Hodgkin lymphoma; PFS: progression free survival; OS: overall survival.
